# Supplementary material for: Preliminary Exploration of Physiology and Genetic Basis Underlying High Yield in Indica–Japonica Hybrid Rice
Source: MDPI journal article supplement (doi:10.3390/agriculture14040607), 2024-04-11
Supplement: s1 [file s1]

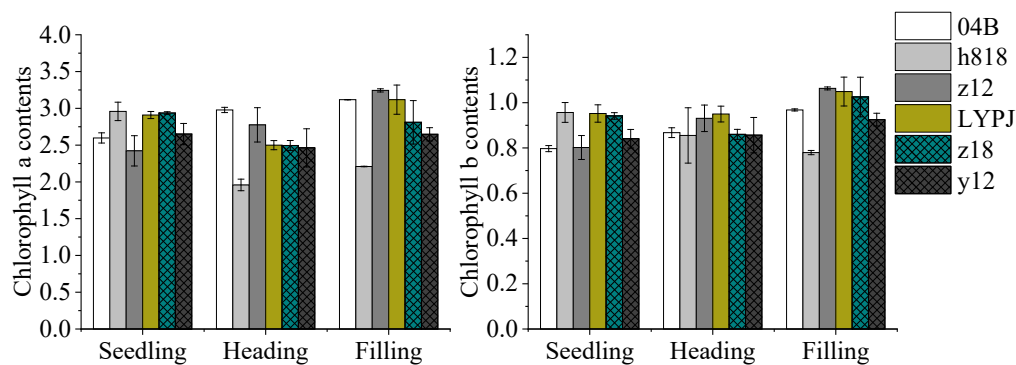

**Figure S1.** Chlorophyll contents among different rice varieties during seedling, heading and filling stages. A, chlorophyll a; B, chlorophyll b.

**Table S1.** Difference in harvest index and ratio of grain to straw among 6 rice lines.

| Lines | Harvest index  | Ratio of grain<br>to straw |
|-------|----------------|----------------------------|
| 04B   | 0.49360±0.007a | \                          |
| H818  | 0.4920±0.005a  | 0.9688±0.02a               |
| Z12   | 0.4801±0.012a  | 0.9256±0.05a               |
| LYPJ  | 0.4807±0.003a  | 0.9259±0.01a               |
| Z18   | 0.4801±0.005a  | 0.9237±0.02a               |
| Y12   | 0.4803±0.008a  | 0.9252±0.03a               |

**Table S2.** Correlation between grain yield per plant and other yield composition factors

| Lines      | Effective<br>panicles<br>number | Total<br>grains per<br>panicle | Total filled<br>grains per<br>panicle | Seed<br>setting<br>rate | 1000-<br>grain<br>weight | Straw<br>yield per<br>plant | Biological<br>yield<br>per plant | Harvest<br>index | Grain<br>straw<br>ratio |
|------------|---------------------------------|--------------------------------|---------------------------------------|-------------------------|--------------------------|-----------------------------|----------------------------------|------------------|-------------------------|
| Zhehui 818 | 0.92**                          | -0.91**                        | -0.92**                               | 0.89**                  | 0.92**                   | -0.99**                     | -0.85**                          | 1.00**           | 1.00**                  |
| Zheyou 18  | -0.78**                         | -0.70*                         | 0.70*                                 | 0.71*                   | 0.70*                    | 0.61*                       | 0.82**                           | -0.06            | -0.07                   |
| Yongyou 12 | -0.64                           | 0.76**                         | 0.77**                                | -0.70*                  | 0.77**                   | 0.34                        | 0.55*                            | -0.03            | -0.05                   |
| Zheyou 12  | 0.98**                          | 0.98**                         | 0.98**                                | -0.99**                 | 0.98**                   | 0.97**                      | 0.99**                           | -0.90**          | -0.90**                 |
| LYPJ       | 0.06                            | -1.00**                        | -1.00**                               | 0.99**                  | -1.00**                  | 1.00**                      | 1.00**                           | -0.99**          | -0.99**                 |
| Integrated | -0.15                           | 0.61*                          | 0.65*                                 | 0.24                    | -0.17                    | 0.91**                      | 0.97**                           | -0.31            | -0.32                   |

\* and \*\* refers to significance at 0.05 and 0.01 level, respectively.

**Table S3. Thirty-five rice materials used to identify *indica* or *japonica* by InDel markers and their results.**

| No. | Materials   | Type                           | Frequency<br>of <i>Indica</i> | Frequency<br>of <i>Japonica</i> |
|-----|-------------|--------------------------------|-------------------------------|---------------------------------|
| 1   | Nipponbare  | Japonica                       | 0.000                         | 1.000                           |
| 2   | 9311        | Indica                         | 1.000                         | 0.000                           |
| 3   | IR36        | Indica                         | 0.842                         | 0.158                           |
| 4   | Nanjing 11  | Indica                         | 1.000                         | 0.000                           |
| 5   | YMZJ        | Japonica                       | 0.079                         | 0.921                           |
| 6   | Balilla     | Japonica                       | 0.000                         | 1.000                           |
| 7   | Zhe04A      | Sterile line of Zheyoun series | 0.026                         | 0.974                           |
| 8   | Zheyoun12   | Hybrid line                    | 0.211                         | 0.789                           |
| 9   | H414        | Restorer line of Z12           | 0.342                         | 0.658                           |
| 10  | Zheyoun712  | Hybrid line                    | 0.211                         | 0.789                           |
| 11  | H712        | Restorer line of Z712          | 0.368                         | 0.632                           |
| 12  | Zheyoun812  | Hybrid line                    | 0.132                         | 0.868                           |
| 13  | H812        | Restorer line of Z812          | 0.263                         | 0.737                           |
| 14  | Zheyoun814  | Hybrid line                    | 0.474                         | 0.526                           |
| 15  | H814        | Restorer line of Z814          | 0.895                         | 0.105                           |
| 16  | Zheyoun818  | Hybrid line                    | 0.395                         | 0.605                           |
| 17  | H818        | Restorer line of Z818          | 0.789                         | 0.211                           |
| 18  | Zheyoun910  | Hybrid line                    | 0.368                         | 0.632                           |
| 19  | F910        | Restorer line of Z910          | 0.763                         | 0.237                           |
| 20  | Zheyoun911  | Hybrid line                    | 0.184                         | 0.816                           |
| 21  | F911        | Restorer line of Z911          | 0.342                         | 0.658                           |
| 22  | Zheyoun924  | Hybrid line                    | 0.316                         | 0.684                           |
| 23  | F924        | Restorer line of Z924          | 0.632                         | 0.368                           |
| 24  | Zheyoun925  | Hybrid line                    | 0.474                         | 0.526                           |
| 25  | F925        | Restorer line of Z925          | 0.947                         | 0.053                           |
| 26  | Zheyoun929  | Hybrid line                    | 0.395                         | 0.605                           |
| 27  | F929        | Restorer line of Z929          | 0.868                         | 0.132                           |
| 28  | Zheyoun935  | Hybrid line                    | 0.526                         | 0.474                           |
| 29  | F935        | Restorer line of Z935          | 1.000                         | 0.000                           |
| 30  | Zheyoun1017 | Hybrid line                    | 0.395                         | 0.605                           |
| 31  | F1017       | Restorer line of Z1017         | 0.789                         | 0.211                           |
| 32  | Xiushui09   | Hybrid                         | 0.053                         | 0.947                           |
| 33  | Zhenshan97A | Sterile line of Shanyoun63     | 0.947                         | 0.053                           |
| 35  | MingH63     | Restorer line of Shanyoun61    | 0.895                         | 0.105                           |
| 34  | Shanyoun63  | Hybrid                         | 0.947                         | 0.053                           |
